# Supplementary material for: Assessment of the Utility of Gene Positioning Biomarkers in the Stratification of Prostate Cancers
Source: bioRxiv preprint, doi:10.1101/728972, version 1 (2019-08-08)
Supplement: Sup Table 6 [file 728972_file10.xlsx]

## Sheet: copy # repro 
Supplementary Table 6: Repositioning events do not correlate with variations in copy number
A: Cancer
	SP100	TGFB3	SATB1	LMNA
C1	1: 37.8%; 2: 61.4%; ≥3: 0.8%	1: 34.3%; 2: 59.8%; ≥3: 5.9%	1: 49.1%; 2: 49.1%; ≥3: 1.7%				gene SD compared to PND (1D KS test P < 0.01)
C2	1: 22.0%; 2: 74.0%; ≥3: 4.1%			1: 27.6%; 2: 70.1%; ≥3: 2.3%			gene NSD compared to PND
C3	1: 42.7%; 2: 56.5%; ≥3: 0.8%	1: 42.6%; 2: 55.0%; ≥3: 2.3%	1: 43.1%; 2: 52.0%; ≥3: 4.9%			1: x%; 2: x%, ≥3: x%	% nuclei with the given number of FISH signals
C4	1: 44.3%; 2: 54.5%; ≥3: 1.2%	1: 27.5%; 2: 70.0%; ≥3: 2.5%
C5	1: 37.7%; 2: 55.7%; ≥3: 6.6%	1: 25.7%; 2: 67.3%; ≥3: 7.1%	1: 41.3%; 2: 50.0%; ≥3: 8.7%	1: 26.7%; 2: 52.6%; ≥3: 20.7%
C6	1: 34.5%; 2: 41.8%; ≥3: 23.4%	1: 30.2%; 2: 38.0%; ≥3: 31.8%	1: 21.8%; 2: 33.9%; ≥3: 44.4%
C7	1: 29.8%; 2: 45.2%; ≥3: 25.0%	1: 12.5%; 2: 24.0%; ≥3: 63.5%	1: 31.8%; 2:37.2 %; ≥3: 31.0%
C8	1: 25.6%; 2: 44.8%; ≥3: 29.6%	1: 14.3%; 27.0%; ≥3: 58.7%	1: 33.1%; 2: 45.7%; ≥3: 21.3%
C9		1: 31.2%; 2: 67.0%; ≥3: 1.8%	1: 41.2%; 2: 52.0%; ≥3: 6.9%
C10	1: 22.6%; 2: 37.1%; ≥3: 40.3%	1: 27.3%; 2: 33.0%; ≥3: 39.8%	1: 28.8%; 2: 44.9%; ≥3: 26.3%
C11	1: 24.2%; 2: 42.2%, ≥3: 33.6%		1: 38.0%; 2: 45.0%, ≥3: 17.1%	1: 30.4%; 2: 32.6%; ≥3: 37.0%
C12	1: 33.6%; 2: 42.2%, ≥3: 24.2%		1: 43.1%; 2: 33.9%; ≥3: 21.5%
C13	1: 44.7%; 2: 51.2%, ≥3: 4.1%		1: 58.0%; 2: 39.5%; ≥3: 2.5%
C14	1: 21.5%; 2: 39.3%, ≥3: 39.3%	1: 44.0%; 2: 46.6%; ≥3: 9.5%	1: 32.5%; 2: 47.9%; ≥3: 19.7%
C15	1: 50.0%; 2: 48.4%; ≥3: 1.6%	1: 32.8%; 2: 67.2%; ≥3: 0.0%	1: 34.6%; 2: 42.3%; ≥3: 23.1%
C16	1: 32.9%; 2: 67.1%; ≥3: 0.0%	1: 35.6%; 2: 64.4%; ≥3: 0.0%	1: 41.7%; 2: 55.4%; ≥3: 2.9%
C17	1: 55.4%; 2: 44.6%; ≥3: 0.0%		1: 50.8%; 2: 45.5%; ≥3: 3.8%
C18				1: 60.7%; 2: 30.0%; ≥3: 4.3%
C19				1: 66.4%; 2: 32.8%; ≥3: 0.9%
C20	1: 22.4%; 2: 28.0%; ≥3: 49.6%	1: 7.5%; 2: 29.2; ≥3: 63.3%	1: 15.7%; 2: 33.1%; ≥3: 51.2%	1: 11.7%; 2: 25.8%; ≥3: 45.8%
C21	1: 39.2%; 2: 57.5%; ≥3: 3.3%	1: 21.7%; 2: 65.2%, ≥3: 13.0%	1: 19.8%; 2: 65.8%; ≥3: 14.4%	1: 35.2%; 2: 61.6%; ≥3: 6.4%
C22	1: 29.6%; 2: 63.5%; ≥3: 7.0%			1: 36.8%; 2: 45.6%; ≥3: 16.0%
C23	1: 19.8%; 2: 57.8%; ≥3: 22.4%	1: 27.6%; 2: 46.5%, ≥3: 26.8%	1: 23.7%; 2: 55.9%; ≥3: 20.3%
C24	1: 48.1%; 2: 49.2%; ≥3: 2.3%	1: 31.1%; 2: 68.9%; ≥3: 0%	1: 49.4%; 2: 48.2%; ≥3: 2.7%
C25	1: 25.0%; 2: 74.2%; ≥3: 0.8%	1: 35.2%; 2: 54.1%; ≥3: 10.7%	1: 32.5%; 2: 64.3%; ≥3: 3.2%
C26	1: 13.1%; 2: 28.5%; ≥3: 58.5%	1: 12.4%; 2: 28.1%; ≥3: 59.5%	1: 17.7%; 2: 30.6%; ≥3: 51.6%	1: 14.7%; 2: 20.2%; ≥3: 65.1%
C27		1: 36.6%; 2: 57.7%; ≥3: 5.7%
C28	1: 56.0%; 2: 42.4%; ≥3: 1.6%		1: 36.2%; 2: 60.1%; ≥3: 4.7%	1: 69.4%; 2: 28.6%; ≥3: 2.0%
C29	1: 30.9%; 2: 43.9%; ≥3: 25.2%
C30	1: 25.8%; 2: 39.5%; ≥3: 34.7%	1: 31.5%; 2: 37.0%; ≥3: 31.5%
C31	1: 41.8%; 2: 58.2%; ≥3: 0.0%	1: 43.0%; 2: 57.0%; ≥3: 0%	1: 51.2%; 2: 47.9%; ≥3: 0.8%
C32	1: 16.1%; 2: 75.8%; ≥3: 8.1%			1: 25.0%; 2: 69.5%; ≥3: 4.6%
B: Benign tissues
ID	SP100	TGFB3	SATB1	LMNA
N1	1: 37.1%; 2: 58.9%; ≥3: 4.0%		1: 45.0%; 2: 49.2%; ≥3: 5.8%
N2	1: 40.4%; 2:56.0 %; ≥3: 3.7%		1: 49.0%; 2: 46.1%; ≥3: 4.9%
N3		1: 40.2%; 2: 51.2%; ≥3: 8.7%
N4		1: 37.1%; 2: 58.9%; ≥3: 4.0%
N5				1: 52.1%; 2: 41.3%; ≥3: 6.6%
N6	1: 32.8%; 2: 67.2%; ≥3: 0.0%	1: 30.5%; 2: 68.0%; ≥3: 1.6%	1: 32.6%; 2: 65.9%; ≥3: 1.5%	1: 32.8%; 2: 65.6%; ≥3: 1.6%
N7	1: 38.3%; 2: 60.2%; ≥3: 1.5%	1: 23.6%; 2: 74.8%; ≥3: 1.6%	1: 26.5%; 2: 66.7%; ≥3: 6.8%	1: 32.8%; 2: 63.9%; ≥3: 3.3%
N8	1: 49.6%; 2: 50.4%; ≥3: 0.0%		1: 60.5%; 2: 36.4%; ≥3: 3.1%
N9	1: 51.6%; 2: 46.8%; ≥3: 1.6%		1: 54.8%; 2: 42.9%; ≥3: 2.4%
N10	1: 27.9%; 2: 69.8%; ≥3: 2.3%		1: 45.7%; 2: 52.8%; ≥3: 1.6%	1: 49.6%; 2: 49.6%; ≥3: 0.8%
N11		1: 39.9%; 2: 56.6%; ≥3: 3.5%
N12		1: 41.3%; 2: 55.6%; ≥3: 3.2%
N13		1: 51.0%; 2: 45.2%; ≥3: 3.8%
N14		1: 33.3%; 2: 59.8%; ≥3: 6.8%
N15				1: 49.1%; 2: 49.1%; ≥3: 1.7%
N16				1: 41.9%; 2: 53.8%; ≥3: 4.3%
B1	1: 37.0%; 2: 60.6%; ≥3: 2.4%	1: 11.4%; 2: 88.6%; ≥3: 0.0%	1: 62.2%; 2: 36.9%; ≥3: 0.9%
B2	1: 36.2%; 2: 63.0%; ≥3: 0.8%			1: 44.4%; 2: 48.4%; ≥3: 7.1%
B3	1: 22.5%; 2: 69.8%; ≥3: 7.8%			1: 21.5%; 2: 74.6%; ≥3: 3.8%
B4	1: 60.9%; 2: 38.2%, ≥3: 0.9%
B5	1: 46.2%; 2: 52.1%; ≥3: 1.7%
B6		1: 27.0%; 2: 69.0%; ≥3: 4.0%	1: 63.0%; 2: 36.0%; ≥3: 1.0%
B7		1: 21.0%; 2: 78.2%; ≥3: 0.8%	1: 29.8%; 2: 68.4%; ≥3: 1.8%
B8		1: 26.0%; 2: 72.4%; ≥3: 1.6%	1: 56.0%; 2: 43.1%; ≥3: 0.9%
B9		1: 47.7%; 2: 52.3%; ≥3: 0.0%	1: 49.6%; 2: 48.9%; ≥3:1.5%
PND	1: 38.3%; 2: 60.2%; ≥3: 1.5%	1: 36.8%; 2: 59.0%; ≥3: 4.2%	1: 42.8%; 2: 53.9%; ≥3: 3.3%	1: 43.0%; 2: 53.9%; ≥3: 3.0%
	7N, 854 nuc	8N, 996 nuc	7N, 874 nuc	6N, 725 nuc
A comparison of the incidence of gene repositioning with the number of FISH signals detect for a gene in a given tissue. Black box: gene was repositioned compared to the PND (P < 0.01). Grey box: gene was not repositioned compared to the PND. C1-32: prostate cancer specimens, N1-16, normal prostate tissues and B1-9, benign disease tissues. Copy numbers are denoted by 1: x%; 2: x%, ≥3: x%,: where …
